# Supplementary material for: Herpes Simplex Virus 1 Manipulates Host Cell Antiviral and Proviral DNA Damage Responses
Source: PubMed Central journal article supplement (PMC7885110; doi:10.1128/mbio.03552-20), 2021-02-09

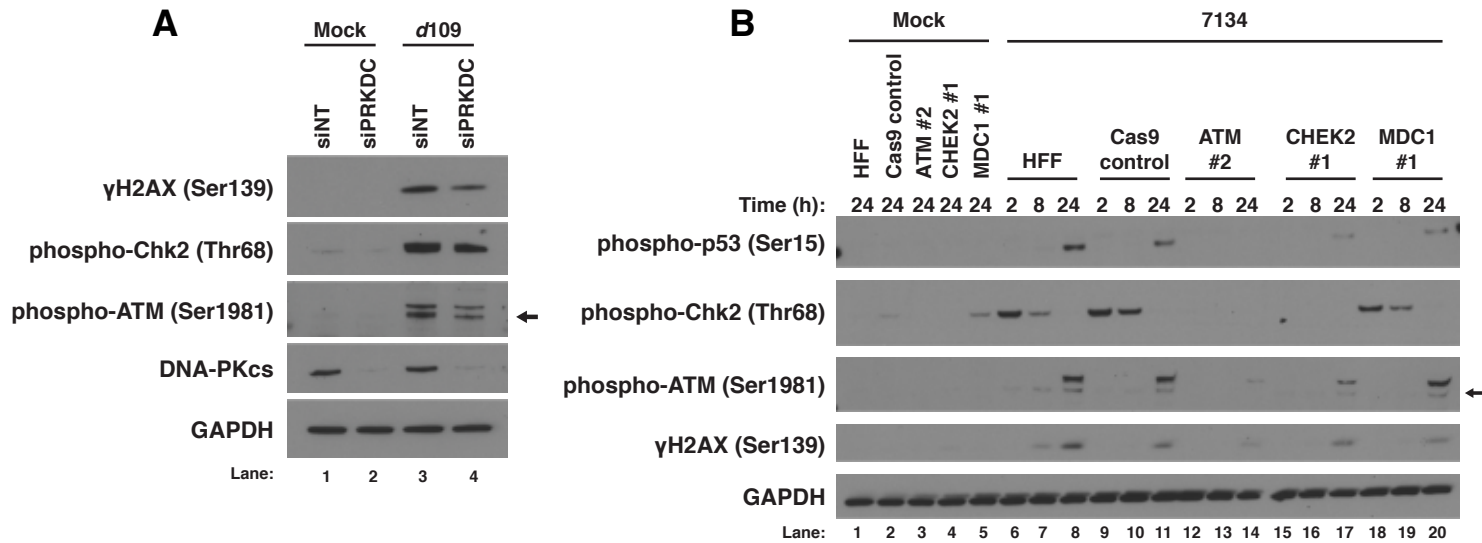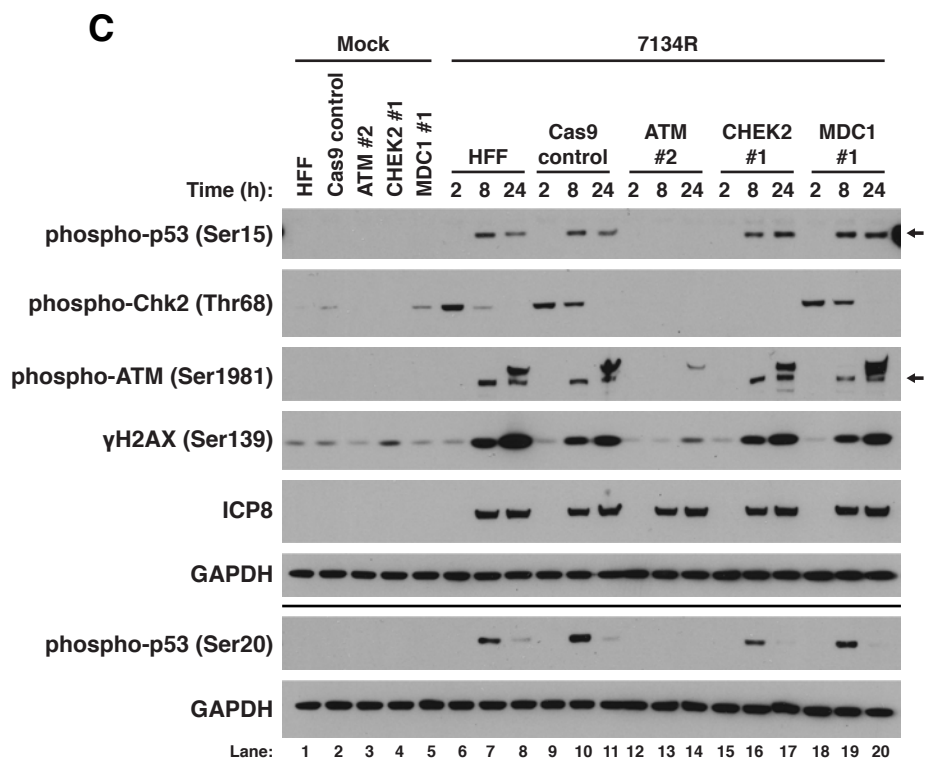

Supplement: mBio.03552-20-sf001.pdf [file mBio.03552-20-sf001.pdf]
